# Supplementary material for: Placental Hypomethylation Is More Pronounced in Genomic Loci Devoid of Retroelements
Source: PubMed Central journal article supplement (PMC4938645; doi:10.1534/g3.116.030379), 2016-04-27
Supplement: supp_g3.116.030379_FigureS1.pdf [file supp_g3.116.030379_FigureS1.pdf]

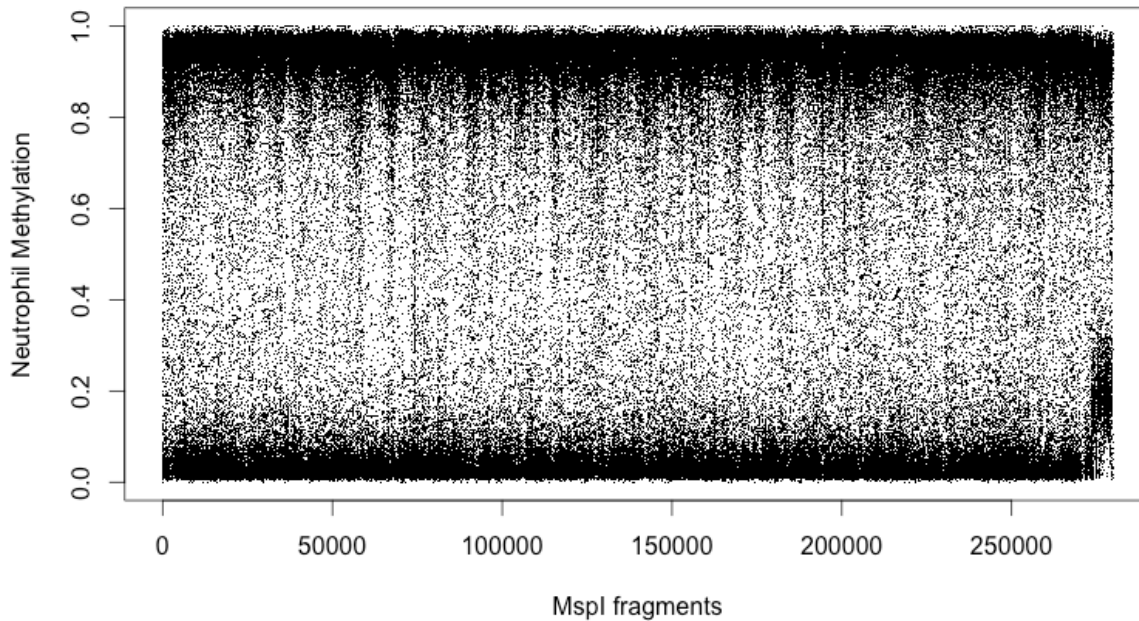

**Figure S1. Methylation of human neutrophils showing all 279,762 total analysed fragments.** The x-axis shows 279,762 fragments where high quality information was available from at least one individual, and the y-axis shows the mean methylation of each fragment (scale of 0 to 1.0).
