# Supplementary material for: Placental Hypomethylation Is More Pronounced in Genomic Loci Devoid of Retroelements
Source: PubMed Central journal article supplement (PMC4938645; doi:10.1534/g3.116.030379), 2016-04-27
Supplement: supp_g3.116.030379_FigureS6.pdf [file supp_g3.116.030379_FigureS6.pdf]

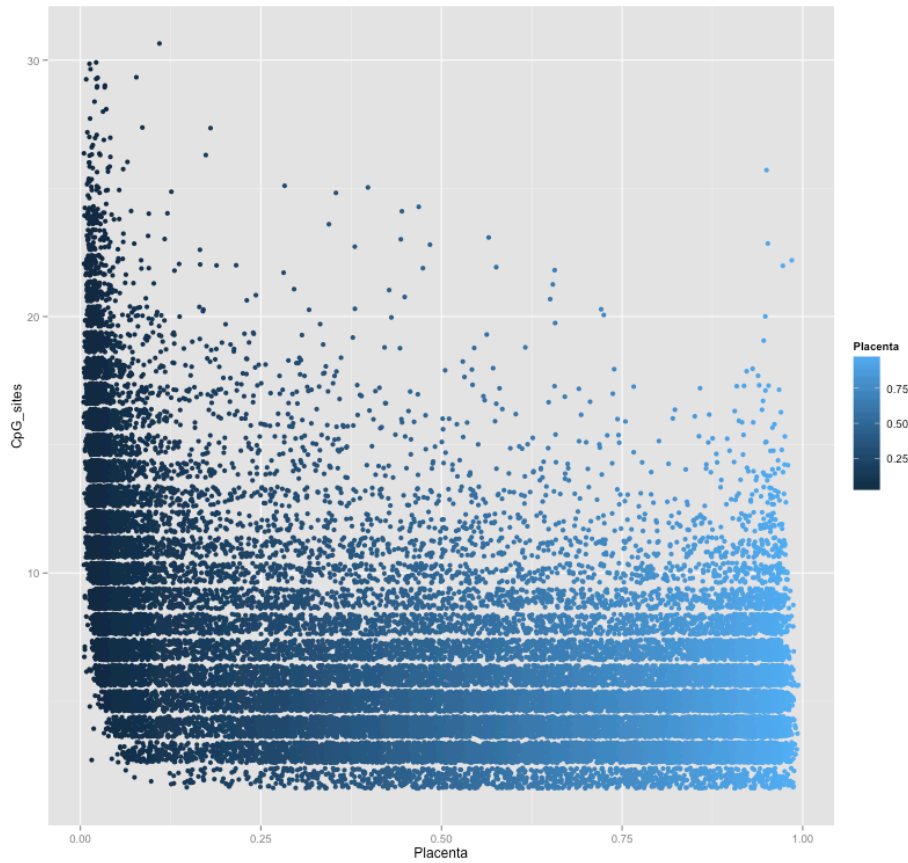

**Figure S6. Number of CpG sites per fragment vs. methylation for placenta.** The y-axis shows the number of CpG sites in each fragment. The x-axis shows the mean methylation value for that fragment (scale of 0 to 1.0).
