# Supplementary material for: Placental Hypomethylation Is More Pronounced in Genomic Loci Devoid of Retroelements
Source: PubMed Central journal article supplement (PMC4938645; doi:10.1534/g3.116.030379), 2016-04-27
Supplement: supp_g3.116.030379_FigureS7.pdf [file supp_g3.116.030379_FigureS7.pdf]

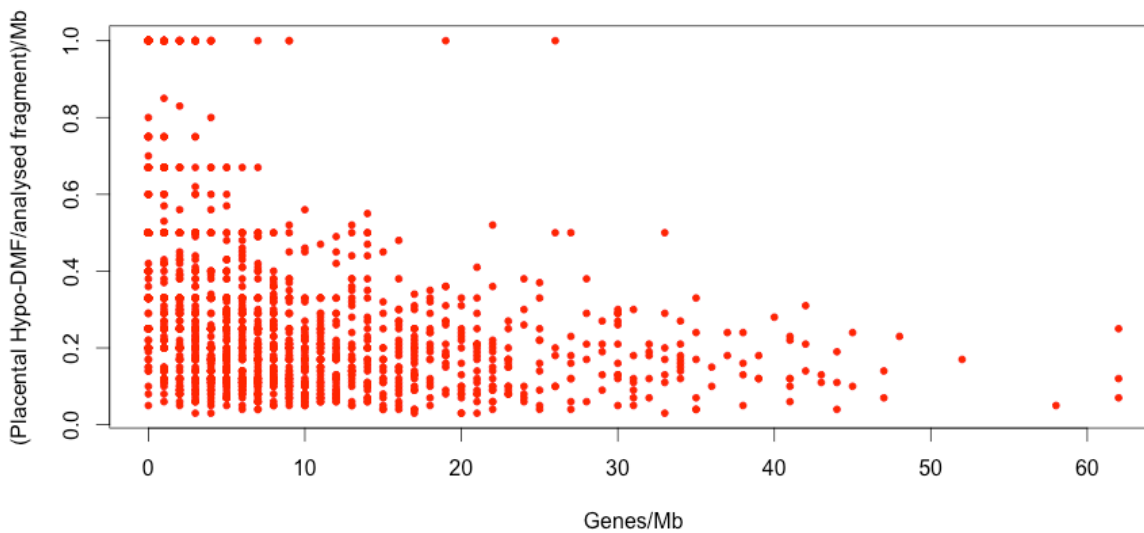

**Figure S7. Relationship of gene density and hypomethylated DMFs.** The y-axis shows the DMF density score, which was generated by dividing the number of DMFs by the number of analysed fragments for each 1 Mb window across the human genome. Tiling windows with at least three analysed fragments were considered for this analysis. The x-axis shows the number of protein coding genes in a 1 Mb window.
