# Supplementary material for: Placental Hypomethylation Is More Pronounced in Genomic Loci Devoid of Retroelements
Source: PubMed Central journal article supplement (PMC4938645; doi:10.1534/g3.116.030379), 2016-04-27
Supplement: supp_g3.116.030379_TableS1.pdf [file supp_g3.116.030379_TableS1.pdf]

**Table S1. Summary of studies reporting placental methylation compared to somatic tissues.**

| <b>Study</b>        | <b>Method</b>             | <b>Somatic</b> | <b>Placenta</b> | <b>%hypomethylation of placenta</b> | <b>Type of somatic cells</b>                            |
|---------------------|---------------------------|----------------|-----------------|-------------------------------------|---------------------------------------------------------|
| Ehrlich 1982 (9)    | HPLC %mC of total bases   | 0.93           | 0.76            | 18%                                 | Heart, liver, lungs, spleen, lymphocytes, brain, thymus |
| Tsein 2002 (10)     | HPLC %methylation of Cs   | 3.72           | 3.20            | 14%                                 | Cerebellum, spleen, lung, heart, liver                  |
| Fuke 2004 (11)      | HPLC %methylation of Cs   | 3.99           | 2.99            | 25%                                 | Whole blood                                             |
| Novakovic 2010 (12) | HPLC %methylation of Cs   | 3.82           | 2.93            | 25%                                 | Cord blood                                              |
| Schroeder 2013 (13) | WGBS %methylation at CpGs | 76.72          | 62.92           | 18%                                 | cerebral cortex, cerebellum, NK cells, kidney           |
| Current study       | RRBS %methylation at CpGs | 47.50          | 37.10           | 22%                                 | Neutrophils                                             |

HPLC, high performance liquid chromatography

WGBS, whole genome bisulphite sequencing

RRBS, reduced representation bisulphite sequencing
