# Supplementary material for: Placental Hypomethylation Is More Pronounced in Genomic Loci Devoid of Retroelements
Source: PubMed Central journal article supplement (PMC4938645; doi:10.1534/g3.116.030379), 2016-04-27
Supplement: supp_g3.116.030379_TableS2.pdf [file supp_g3.116.030379_TableS2.pdf]

**Table S2. Clinical details of placental samples used in this study.**

| <b>Study number</b> | <b>Gest</b> | <b>Mat Age</b> | <b>Mat BMI</b> | <b>Baby BW (g)</b> | <b>Placental W (g)</b> | <b>Sex</b> | <b>Smoker</b> | <b>Parity</b> |
|---------------------|-------------|----------------|----------------|--------------------|------------------------|------------|---------------|---------------|
| 88                  | 24.2        | 29             | 30.5           | 825                | 155                    | m          | n             | G2P1          |
| 47                  | 30.3        | 28             | 23             | 1475               | 395                    | m          | n             | G2P0          |
| 46                  | 30.3        | 28             | 23             | 1275               | 395                    | f          | n             | G2P0          |
| 159                 | 33.4        | 19             | 25.9           | 2000               | 405                    | f          | n             | G4P2          |
| 140                 | 35.2        | 32             | 27.3           | 3120               | 538                    | f          | y             | G1P0          |
| 121                 | 36.1        | 30             | 30.1           | 2880               | 504                    | f          | n             | G1P0          |
| 122                 | 36.6        | 39             | 27.7           | 3490               | 526                    | m          | n             | G1P0          |
| 478                 | 38.1        | 33             | 22.9           | 3100               | 464                    | m          | n             | G1P0          |
| 410                 | 39.1        | 35             | 33.5           | 3965               | 452                    | f          | n             | G2P0          |
| 32                  | 39.3        | 32             | 25.4           | 2870               | 370                    | f          | n             | G1P1          |
| 416                 | 40.2        | 42             | 19.7           | 4040               | 590                    | m          | n             | G7P3          |

Abbreviations: Gest, gestation; Mat, maternal; BMI, body mass index; BW, birth weight; W, weight
