# Supplementary material for: Placental Hypomethylation Is More Pronounced in Genomic Loci Devoid of Retroelements
Source: PubMed Central journal article supplement (PMC4938645; doi:10.1534/g3.116.030379), 2016-04-27
Supplement: supp_g3.116.030379_TableS3.pdf [file supp_g3.116.030379_TableS3.pdf]

**Table S3: Average methylation of major genomic elements and contribution to placental hypomethylation.**

|                                 | NT<br>(mean) | PL<br>(mean) | Number of<br>fragments | Difference in<br>methylation | Weighted contribution<br>to decreased<br>methylation |
|---------------------------------|--------------|--------------|------------------------|------------------------------|------------------------------------------------------|
| Promoter<br>-5 - +1 kb          | 0.20         | 0.17         | 6109                   | 0.03                         | 0.57                                                 |
| Intergenic (> 5<br>kb upstream) | 0.70         | 0.51         | 12254                  | 0.19                         | 7.2                                                  |
| Exon                            | 0.71         | 0.59         | 2000                   | 0.12                         | 0.75                                                 |
| Intron                          | 0.72         | 0.58         | 10211                  | 0.14                         | 4.5                                                  |
| Gene body<br>boundary           | 0.74         | 0.60         | 1543                   | 0.14                         | 0.67                                                 |
| All repeats                     | 0.75         | 0.58         | 11188                  | 0.17                         | 5.9                                                  |

Abbreviations: NT: neutrophils; PL: placenta
