# Supplementary material for: Placental Hypomethylation Is More Pronounced in Genomic Loci Devoid of Retroelements
Source: PubMed Central journal article supplement (PMC4938645; doi:10.1534/g3.116.030379), 2016-04-27
Supplement: supp_g3.116.030379_TableS4.pdf [file supp_g3.116.030379_TableS4.pdf]

**Table S4: Mean and median fragment methylation for each repeat element class in neutrophils and placenta.**

| Repeat classes | Sub class                         | Number. of fragments | Mean  |       | Median |       | Difference |
|----------------|-----------------------------------|----------------------|-------|-------|--------|-------|------------|
|                |                                   |                      | NT    | PL    | NT     | PL    |            |
| SINE           | Alu                               | 4577                 | 0.878 | 0.682 | 0.940  | 0.759 | 0.18       |
| SINE           | MIR                               | 735                  | 0.730 | 0.549 | 0.892  | 0.575 | 0.32       |
| LINE           | L1                                | 612                  | 0.833 | 0.620 | 0.924  | 0.651 | 0.27       |
| LINE           | L2                                | 529                  | 0.789 | 0.597 | 0.910  | 0.635 | 0.28       |
| LTR            | ERV1                              | 1215                 | 0.868 | 0.672 | 0.929  | 0.709 | 0.22       |
| LTR            | ERVK                              | 121                  | 0.791 | 0.550 | 0.904  | 0.594 | 0.31       |
| LTR            | ERVL                              | 258                  | 0.827 | 0.602 | 0.912  | 0.605 | 0.31       |
| LTR            | ERVL-MaLR                         | 360                  | 0.866 | 0.613 | 0.922  | 0.616 | 0.31       |
| Satellite      | Satellite, centromeric, telomeric | 125                  | 0.796 | 0.522 | 0.878  | 0.529 | 0.35       |
| Low complexity | Low complexity                    | 1138                 | 0.095 | 0.099 | 0.025  | 0.032 | -0.01      |
| Simple repeat  | Simple repeat                     | 253                  | 0.207 | 0.169 | 0.025  | 0.037 | -0.01      |
| DNA repeat     | DNA repeat                        | 420                  | 0.797 | 0.598 | 0.914  | 0.630 | 0.28       |
| Other repeat   | Other repeat                      | 116                  | 0.928 | 0.819 | 0.947  | 0.834 | 0.11       |

Abbreviations: NT: neutrophils; PL: placenta
