# Supplementary material for: Placental Hypomethylation Is More Pronounced in Genomic Loci Devoid of Retroelements
Source: PubMed Central journal article supplement (PMC4938645; doi:10.1534/g3.116.030379), 2016-04-27
Supplement: supp_g3.116.030379_TableS5.pdf [file supp_g3.116.030379_TableS5.pdf]

**Table S5: Methylation of retro vs. non-retroelement-containing fragments in neutrophils and placenta.**

| Elements   | # of fragments | Retroelements |       |        |       |            | Non-retroelements |       |        |       |       |            |
|------------|----------------|---------------|-------|--------|-------|------------|-------------------|-------|--------|-------|-------|------------|
|            |                | Mean          |       | Median |       |            | Mean              |       | Median |       |       |            |
|            |                | NT            | PL    | NT     | PL    | Difference | # of fragments    | NT    | PL     | NT    | PL    | Difference |
| Promoter   | 680            | 0.627         | 0.460 | 0.863  | 0.446 | 0.416      | 5401              | 0.146 | 0.131  | 0.033 | 0.043 | -0.010     |
| Intergenic | 4664           | 0.863         | 0.632 | 0.927  | 0.660 | 0.267      | 7376              | 0.594 | 0.424  | 0.816 | 0.416 | 0.400      |
| Exon       | 39             | 0.821         | 0.705 | 0.923  | 0.788 | 0.136      | 1922              | 0.710 | 0.589  | 0.924 | 0.689 | 0.235      |
| Intron     | 3159           | 0.861         | 0.704 | 0.943  | 0.800 | 0.143      | 8387              | 0.550 | 0.437  | 0.790 | 0.408 | 0.382      |

Abbreviations: NT, neutrophils; PL, placenta
