# Supplementary material for: Placental Hypomethylation Is More Pronounced in Genomic Loci Devoid of Retroelements
Source: PubMed Central journal article supplement (PMC4938645; doi:10.1534/g3.116.030379), 2016-04-27
Supplement: supp_g3.116.030379_TableS6.pdf [file supp_g3.116.030379_TableS6.pdf]

**Table S6. Categories of retroelements that are highly methylated (>0.7) in neutrophils that retain very high methylation (> 0.8) in the placenta. Columns 2 and 3 show the composition of the retrotransposons that retain or do not retain high methylation. The percentage of each class that retains high methylation in the placenta (> 0.8) is shown in column 4.**

| <b>Total</b>      | <b>Plac &gt; 0.8</b> | <b>Plac &lt; 0.8</b> | <b>Percent of category that retains methylation &gt; 0.8 in placenta</b> |
|-------------------|----------------------|----------------------|--------------------------------------------------------------------------|
| L1                | 0.059                | 0.096                | 24.0%                                                                    |
| L2                | 0.039                | 0.051                | 28.4%                                                                    |
| Alu               | 0.558                | 0.452                | 38.6%                                                                    |
| MIR               | 0.040                | 0.066                | 23.6%                                                                    |
| ERVK              | 0.008                | 0.015                | 21.8%                                                                    |
| ERVL              | 0.023                | 0.041                | 22.1%                                                                    |
| ERVL-MaLR         | 0.034                | 0.058                | 23.1%                                                                    |
| ERV1              | 0.211                | 0.195                | 35.5%                                                                    |
| All retroelements | 1.000                | 1.000                |                                                                          |
