# Supplementary material for: Placental Hypomethylation Is More Pronounced in Genomic Loci Devoid of Retroelements
Source: PubMed Central journal article supplement (PMC4938645; doi:10.1534/g3.116.030379), 2016-04-27
Supplement: supp_g3.116.030379_TableS7.pdf [file supp_g3.116.030379_TableS7.pdf]

**Table S7. Differentially methylated fragments in neutrophils and placenta.**

| <b>Criteria</b>                                                    | <b>R<math>\geq</math>6, S<math>\geq</math>6*</b> |
|--------------------------------------------------------------------|--------------------------------------------------|
| Significant fragments ( $1.55 \times 10^{-6**}$ and $> 0.25$ diff) | 6767                                             |
| CpG sites within these                                             | 38307                                            |
| Mean CpGs per fragment                                             | 5.66                                             |
| Placenta hypo                                                      | 6146                                             |
| Mean CpGs per fragment (hypo)                                      | 5.56                                             |
| Placenta hyper                                                     | 621                                              |
| Mean CpGs per fragment (hyper)                                     | 6.67                                             |
| % of DMFs that are hypo meth in placenta                           | 90.8                                             |

\* R = number of neutrophil samples fulfilling coverage criteria and S = number of placenta samples fulfilling coverage criteria.

\*\* Significance level = 0.05, adjusted with multiple test correction by the Bonferroni method.
