# Supplementary material for: Placental Hypomethylation Is More Pronounced in Genomic Loci Devoid of Retroelements
Source: PubMed Central journal article supplement (PMC4938645; doi:10.1534/g3.116.030379), 2016-04-27
Supplement: supp_g3.116.030379_TableS8.pdf [file supp_g3.116.030379_TableS8.pdf]

**Table S8: Overlap of placental hypomethylated DMFs with placental partially methylated domains (PMDs).**

| <b>Number of fragments analysed</b>  | <b>Number of fragments in PMD regions</b> | <b>Percentage overlapping</b> |
|--------------------------------------|-------------------------------------------|-------------------------------|
| 32163 (comparison fragments)         | 8783                                      | 27.3                          |
| 26017 (placental non-hypo fragments) | 6494                                      | 25.0                          |
| 6146 (hypomethylated in placenta)    | 2289                                      | 37.2                          |
