# Supplementary material for: Placental Hypomethylation Is More Pronounced in Genomic Loci Devoid of Retroelements
Source: PubMed Central journal article supplement (PMC4938645; doi:10.1534/g3.116.030379), 2016-04-27
Supplement: supp_g3.116.030379_TableS9.pdf [file supp_g3.116.030379_TableS9.pdf]

**Table S9. Gene ontology enrichment of genes containing hypomethylated placenta DMFs<sup>1</sup>**

| Annotation term                                              | Number of genes | Fold enrichment <sup>2</sup> | P value <sup>3</sup> |
|--------------------------------------------------------------|-----------------|------------------------------|----------------------|
| <b>Biological Process</b>                                    |                 |                              |                      |
| Epithelial structure maintenance                             | 3               | 29.4                         | 0.004                |
| Tissue homeostasis                                           | 6               | 5.6                          | 0.004                |
| Digestion                                                    | 6               | 3.9                          | 0.019                |
| Visual perception                                            | 9               | 2.5                          | 0.030                |
| Negative regulation of cell differentiation                  | 9               | 2.5                          | 0.030                |
| Cellular amino acid biosynthetic process                     | 4               | 4.6                          | 0.055                |
| Regulation of cell projection organization                   | 5               | 3.3                          | 0.064                |
| Enzyme linked receptor protein signaling pathway             | 11              | 1.9                          | 0.066                |
| Regulation of mitosis                                        | 4               | 4.2                          | 0.069                |
| Negative regulation of granulocyte differentiation           | 2               | 23.5                         | 0.082                |
| Protein complex assembly                                     | 14              | 1.6                          | 0.088                |
| ncRNA metabolic process                                      | 8               | 2.0                          | 0.096                |
| Blood circulation                                            | 7               | 2.2                          | 0.096                |
| <b>Molecular Function</b>                                    |                 |                              |                      |
| Enzyme inhibitor activity                                    | 10              | 2.2                          | 0.041                |
| Ras guanyl-nucleotide exchange factor activity               | 5               | 3.3                          | 0.062                |
| Structural molecule activity                                 | 17              | 1.6                          | 0.073                |
| Oxidoreductase activity, acting on the CH-NH group of donors | 3               | 6.1                          | 0.086                |
| Protein C-terminus binding                                   | 6               | 2.5                          | 0.092                |
| Alkali metal ion binding                                     | 8               | 2.1                          | 0.093                |
| <b>Cellular Component</b>                                    |                 |                              |                      |
| Anchored to membrane                                         | 10              | 2.6                          | 0.015                |
| Extracellular matrix                                         | 13              | 2.2                          | 0.017                |
| Cilium                                                       | 6               | 2.7                          | 0.074                |
| Plasma membrane part                                         | 47              | 1.2                          | 0.099                |
| Intermediate filament                                        | 7               | 2.2                          | 0.100                |

<sup>1</sup> 405 DMFs hypomethylated in placenta overlapped the promoters of 355 genes. DAVID was used for gene ontology enrichment of 323 unique gene IDs.

<sup>2</sup> Fold enrichment of gene ontology annotations compared to background of all human protein-coding genes.

<sup>3</sup> DAVID uses a modified Fisher's exact test for enrichment evaluation analysis.
