# Supplementary material for: Placental Hypomethylation Is More Pronounced in Genomic Loci Devoid of Retroelements
Source: PubMed Central journal article supplement (PMC4938645; doi:10.1534/g3.116.030379), 2016-04-27
Supplement: supp_g3.116.030379_TableS10.pdf [file supp_g3.116.030379_TableS10.pdf]

**Table S10. Gene ontology enrichment of genes containing hypermethylated placenta DMFs<sup>1</sup>**

| Annotation term                             | Number of genes | Fold enrichment <sup>2</sup> | P value <sup>3</sup> |
|---------------------------------------------|-----------------|------------------------------|----------------------|
| <b>Biological Process</b>                   |                 |                              |                      |
| Positive regulation of transcription        | 10              | 3.9                          | 0.001                |
| Gut morphogenesis                           | 3               | 38.5                         | 0.003                |
| Mesoderm development                        | 4               | 11.8                         | 0.005                |
| Blood vessel development                    | 6               | 5.3                          | 0.005                |
| Morphogenesis of an epithelium              | 4               | 8.6                          | 0.011                |
| Regulation of T cell differentiation        | 3               | 12.8                         | 0.022                |
| Regulation of cell proliferation            | 9               | 2.5                          | 0.024                |
| Macrophage differentiation                  | 2               | 54.5                         | 0.036                |
| Gastrulation                                | 3               | 9.4                          | 0.040                |
| Chordate embryonic development              | 5               | 3.3                          | 0.062                |
| Macrophage activation                       | 2               | 29.1                         | 0.066                |
| Regulation of programmed cell death         | 8               | 2.1                          | 0.072                |
| Limb morphogenesis                          | 3               | 6.6                          | 0.073                |
| Negative regulation of cell differentiation | 4               | 4.0                          | 0.074                |
| Respiratory tube development                | 3               | 6.4                          | 0.077                |
| Female pregnancy                            | 3               | 6.0                          | 0.088                |
| <b>Molecular Function</b>                   |                 |                              |                      |
| Transcription regulator activity            | 20              | 3.2                          | $3.9 \times 10^{-6}$ |
| Identical protein binding                   | 8               | 3.0                          | 0.015                |

<sup>1</sup> 107 DMFs hypermethylated in placenta overlapped the promoters of 98 genes. DAVID was used for gene ontology enrichment of 88 unique gene IDs.

<sup>2</sup> Fold enrichment of gene ontology annotations compared to background of all human protein-coding genes.

<sup>3</sup> DAVID uses a modified Fisher's exact test for enrichment evaluation analysis.
